# Supplementary material
Source: ML conference proceedings conference paper supplement (https://openaccess.thecvf.com/content/ICCV_2019/html/Strecke_EM-Fusion_Dynamic_Object-Level_ICCV_2019_paper.html)
Supplement: Supplementary file 1 [file Strecke_EM-Fusion_Dynamic_Object-Level_ICCV_2019_supplemental.zip]

Archive with 2 entries (2 files):
- 5672-supp.pdf
- 5672-supp.mp4
